# Supplementary material for: Novel variants in the ACTA2 and MYH11 genes in a Cypriot family with thoracic aortic aneurysms: a case report
Source: PubMed Central journal article supplement (PMC6286578; doi:10.1186/s12881-018-0728-0), 2018-12-07
Supplement: 12881_2018_728_MOESM1_ESM.pdf [file 12881_2018_728_MOESM1_ESM.pdf]

Genes associated with the development of TAAD

| <b>Gene</b>    | <b>Protein</b>                              |
|----------------|---------------------------------------------|
| <i>ACTA2</i>   | Smooth muscle $\alpha$ -actin               |
| <i>BGN</i>     | Biglycan                                    |
| <i>COL1A2</i>  | Collagen 1 $\alpha$ 2 chain                 |
| <i>COL3A1</i>  | Collagen 3 $\alpha$ 1 chain                 |
| <i>COL5A1</i>  | Collagen 5 $\alpha$ 1 chain                 |
| <i>COL5A2</i>  | Collagen 5 $\alpha$ 2 chain                 |
| <i>EFEMP2</i>  | Fibulin-4                                   |
| <i>ELN</i>     | Elastin                                     |
| <i>EMILIN1</i> | Elastin microfibril interface 1             |
| <i>FBN1</i>    | Fibrillin-1                                 |
| <i>FBN2</i>    | Fibrillin-2                                 |
| <i>FLNA</i>    | Filamin A                                   |
| <i>FOXE3</i>   | Forkhead box 3                              |
| <i>LOX</i>     | Lysyl oxidase                               |
| <i>MAT2A</i>   | Methionine adenosyl-transferase II $\alpha$ |
| <i>MFAP5</i>   | Microfibril-associated glycoprotein 2       |
| <i>MYH11</i>   | Smooth muscle myosin heavy chain            |
| <i>MYLK</i>    | Myosin light chain kinase                   |
| <i>NOTCH1</i>  | NOTCH1                                      |
| <i>PRKG1</i>   | Type 1 cGMP-dependent protein kinase        |
| <i>SKI</i>     | Sloan Kettering proto-oncoprotein           |
| <i>SLC2A10</i> | Glucose transporter 10                      |
| <i>SMAD2</i>   | SMAD2                                       |
| <i>SMAD3</i>   | SMAD3                                       |
| <i>SMAD4</i>   | SMAD4                                       |
| <i>SMAD6</i>   | SMAD6                                       |
| <i>TGFB2</i>   | TGF- $\beta$ 2                              |
| <i>TGFB3</i>   | TGF- $\beta$ 3                              |
| <i>TGFBR1</i>  | TGF- $\beta$ receptor type 1                |
| <i>TGFBR2</i>  | TGF- $\beta$ receptor type 2                |
